# Supplementary material for: Differentiating Drosophila female germ cells initiate Polycomb silencing by regulating PRC2-interacting proteins
Source: eLife. 2020 Aug 10;9:e56922. doi: 10.7554/eLife.56922 (PMC7438113; doi:10.7554/eLife.56922)
Supplement: Figure 1—source data 1. [file elife-56922-fig1-data1.xlsx]

## Sheet: bxd
hs_bxd	wRNAi_GSC	wRNAi_region 1	wRNAi_2A	wRNAi_2B	wRNAi_st1-2	wRNAi_st3-4	wRNAi_st5	wRNAi_st6	wRNAi_st7	wRNAi_st8	wRNAi_st9	wRNAi_st10		w2RNAi_GSC	w2RNAi_region 1	w2RNAi_2A	w2RNAi_2B	w2RNAi_st1-2	w2RNAi_st3-4	w2RNAi_st5	w2RNAi_st6	w2RNAi_st7	w2RNAi_st8	w2RNAi_st9	w2RNAi_st10		ezRNAi2_GSC	ezRNAi2_region 1	ezRNAi2_2A	ezRNAi2_2B	ezRNAi2_st1-2	ezRNAi2_st3-4	ezRNAi2_st5	ezRNAi2_st6	ezRNAi2_st7	ezRNAi2_st8	ezRNAi2_st9	ezRNAi2_st10		scmRNAi2_GSC	scmRNAi2_region 1	scmRNAi2_2A	scmRNAi2_2B	scmRNAi2_st1-2	scmRNAi2_st3-4	scmRNAi2_st5	scmRNAi2_st6	scmRNAi2_st7	scmRNAi2_st8
	2688	6812.88	2516	2060	3414	4640	6094	6537	5798	3704	1848	1808		2499	4426	2174	2019	3619	3796	4710	4595	5733	3860	1730	2466		3521.96	5305.08	3251.57	3094.48	2674.03	5751.7	8419.28	10689.2	9600.91	12672.3	15531.6	13262.5		2535	5205	1170	1972	2420	3873	4419	7319	6189	6755
	2084	4742.88	1761	2384	3066	3822	5797	4021	5558	4223	2555	992		1996	5203	2097	1976	3314	5043	6042	6018	5065	3458	1897	2092		2890.64	4213.21	2166.31	2897.16	5441.65	6604.13	6113.59	11308.4	10723.7	11750.5	15821.3	14378.4		1758	3384	1533	2372	2746	4460	6021	7190	6252	6951
	2528	5040.96	2081	1663	2826	4397	6187	5984	3566	3407	1664	1641		3675	3065	1210	2251	2985	3656	3941	5116	4457	2759	2353	2192		3140.5	6311.4	2230.34	2871.86	5486.76	6577.13	8281.36	11438.5	12485.5	10964	16358.9	11894.5		1533	3558	908	1753	2460	3705	4526	6917	4915	5279
	2132	5692.17	1654	2119	2387	3237	5089	5921	6237	3488	1771	691		2351	3300	1293	2211	3811	5705	4729	3771	4747	2925	1584	2617			4543.07	3195.41	2186.46	3067.19	6339.2	9247.37	12972.5	10952.8	11655.4	15997.9	14527.7		2356	3940	1520	2014	2759	3948	4992	6455		5729
	2703.6	4711.85	1388	2292	3129	3320	6371	5605	6406	2880	2269	1495		2822	3729	1386	1810	3141	3114	3887		2669	4489	1866	1404			5032.58	3355.42	2202.24	4532.56	5556.88	6748.55	8846.72	10884.8	13887.2	15849.9												5077
	2523.81	6881.76	1894		2599		5914	7702	5704	3758	2388					1628				3132		3358	2442	1691	1549			6088.96	2205.66	3139.29	3673.75	7269.11	9405.65	12013.8	10625.4	13176.7	13039.7
	3078.36	3518.1			2045		6365		4634		1880												2678		1592				2048.16		5614.71	5642.14	10583.7	10081.8	9837.05	13220.3	13525.8
	2472.96				2710		5709		6500		1656												2241		2330				3261.83			6976.27	8518.62	11655.3	8920.26	13276.8	15590.7
					2555				5494		3643												2859									7180.19	9063.25	11644.7		10919.6
									6083		3314												2356									6110.74	6198.27	9107.31
									5461		1510																						7620.47	8448.63
									3057		2469																						6674.24	9518.83
											1955
											2737
nohs_bxd	170	210	236	554	865	900	735	694	668	775	721	434		152	148	166	327	646	1580	1324	2289	2041	1583	1472	942		236.445	347.163	398.724	288.395	759.998	1868.49	2782.03	3645.23	4627.61	4579.41	6553.11	5811.01		131	138	217	330	1321	1762	1651	2772	2570	3390
	151	170	257	460	789	959	820	481	460	602	1027	621		102	133	196	352	979	1150	1345	1424	2011	1849	2584	1554		203.287	219.759	243.646	297.067	875.191	1599.36	2330.26	3426.57	3485.15	5594.74	7789.98	6674.78		107	105	154	425	1130	1600	1239	1902	2491	2817
	188	219	289	509	338	807	769	861	565	533	599	856		133	176	133	227	592	1456	1169	1941	2609	2048	2355	1567		374.648	235.251	247.609	444.875	752.003	1666.22	2463.36	2438.7	2586.93	4330.96		4056.72		135	118	150	406	1050	1080	1287	1847	2349	3074
	146	165	277	537	677	1133	941	689	507	558	903	949								1103		1611	2225	1101	1503							1316.93	1734.43	2711.85	4036.32	7150.5		6755.07		97	104	187	494	707	1331	1171	2899	2079	3408
			270		641	1076	806	623	555	906												2237		1902	1133							1476.99	2238.11	2863.79	4245.73	5590.51								1021	1261	1376		2437	3323
					437	872	549	969	1015	883												1481		2296	1095								1954.78		3177.28
					385		936	443		874																							2954.72
							779	822		908
								495
								584
								758
								550
								780
no hs avg	163.75	191	265.8	515	590.286	957.833	791.875	673	628.333	754.875	812.5	715		129	152.333	165	302	739	1395.33	1235.25	1884.67	1998.33	1926.25	1951.67	1299		271.46	267.391	296.66	343.446	795.731	1585.6	2351.1	3017.23	3693.17	5449.22	7171.55	5824.4		117.5	116.25	177	413.75	1045.8	1406.8	1344.8	2355	2385.2	3202.4
hs_bxd_backgroundsubtract	wRNAi_GSC	wRNAi_region 1	wRNAi_2A	wRNAi_2B	wRNAi_st1-2	wRNAi_st3-4	wRNAi_st5	wRNAi_st6	wRNAi_st7	wRNAi_st8	wRNAi_st9	wRNAi_st10		w2RNAi_GSC	w2RNAi_region 1	w2RNAi_2A	w2RNAi_2B	w2RNAi_st1-2	w2RNAi_st3-4	w2RNAi_st5	w2RNAi_st6	w2RNAi_st7	w2RNAi_st8	w2RNAi_st9	w2RNAi_st10		ezRNAi2_GSC	ezRNAi2_region 1	ezRNAi2_2A	ezRNAi2_2B	ezRNAi2_st1-2	ezRNAi2_st3-4	ezRNAi2_st5	ezRNAi2_st6	ezRNAi2_st7	ezRNAi2_st8	ezRNAi2_st9	ezRNAi2_st10		scmRNAi2_GSC	scmRNAi2_region 1	scmRNAi2_2A	scmRNAi2_2B	scmRNAi2_st1-2	scmRNAi2_st3-4	scmRNAi2_st5	scmRNAi2_st6	scmRNAi2_st7	scmRNAi2_st8
	2524	6621.88	2250	1545	2824	3682	5302	5864	5170	2949	1035	1093		2370	4274	2009	1717	2880	2401	3475	2710	3735	1934	-222	1167		3250.96	5038.08	2954.57	2751.48	1878.03	4165.7	6068.28	7672.17	5907.91	7223.27	8359.64	7438.53		2417	5089	993	1558	1374	2466	3074	4964	3804	3553
	1920	4551.88	1495	1869	2476	2864	5005	3348	4930	3468	1742	277		1867	5051	1932	1674	2575	3648	4807	4133	3067	1532	-55	793		2619.64	3946.21	1869.31	2554.16	4645.65	5018.13	3762.59	8291.43	7030.71	6301.49	8649.29	8554.36		1640	3268	1356	1958	1700	3053	4676	4835	3867	3749
	2364	4849.96	1815	1148	2236	3439	5395	5311	2938	2652	851	926		3546	2913	1045	1949	2246	2261	2706	3231	2459	833	401	893		2869.5	6044.4	1933.34	2528.86	4690.76	4991.13	5930.36	8421.5	8792.46	5514.97	9186.93	6070.5		1415	3442	731	1339	1414	2298	3181	4562	2530	2077
	1968	5501.17	1388	1604	1797	2279	4297	5248	5609	2733	958	-24		2222	3148	1128	1909	3072	4310	3494	1886	2749	999	-368	1318			4276.07	2898.41	1843.46	2271.19	4753.2	6896.37	9955.47	7259.83	6206.45	8825.9	8703.68		2238	3824	1343	1600	1713	2541	3647	4100		2527
	2539.6	4520.85	1122	1777	2539	2362	5579	4932	5778	2125	1456	780		2693	3577	1221	1508	2402	1719	2652		671	2563	-86	105			4765.58	3058.42	1859.24	3736.56	3970.88	4397.55	5829.72	7191.83	8438.19	8677.91												1875
	2359.81	6690.76	1628		2009		5122	7029	5076	3003	1575					1463				1897		1360	516	-261	250			5821.96	1908.66	2796.29	2877.75	5683.11	7054.65	8996.83	6932.41	7727.73	5867.7
	2914.36	3327.1			1455		5573		4006		1067												752		293				1751.16		4818.71	4056.14	8232.65	7064.75	6144.05	7771.3	6353.82
	2308.96				2120		4917		5872		843												315		1031				2964.83			5390.27	6167.62	8638.3	5227.26	7827.82	8418.67
					1965				4866		2830												933									5594.19	6712.25	8627.73		5470.56
									5455		2501												430									4524.74	3847.27	6090.31
									4833		697																						5269.47	5431.63
									2429		1656																						4323.24	6501.83
											1142
											1924
AVERAGE	2362.34	5151.94	1616.33	1588.6	2157.89	2925.2	5148.75	5288.67	4746.83	2821.67	1448.36	610.4		2539.6	3792.6	1466.33	1751.4	2635	2867.8	3171.83	2990	2340.17	1080.7	-98.5	731.25		2913.37	4982.05	2417.34	2388.91	3559.81	4814.75	5721.86	7626.81	6810.81	6942.42	8042.48	7691.77		1927.5	3905.75	1105.75	1613.75	1550.25	2589.5	3644.5	4615.25	3400.33	2756.2
STDEV	319.889	1213.14	387.908	278.561	415.534	627.545	422.542	1204.6	1091.7	444.71	640.138	467.678		636.081	873.356	415.578	180.486	339.192	1071.74	998.188	941.939	1131.54	719.219	270.495	458.232		317.935	831.315	593.769	429.504	1226.67	629.113	1416.47	1426.71	1075.99	1093.18	1225.84	1219.38		476.562	822.304	301.144	256.445	181.237	325.274	731.278	382.202	754.389	853.068
[truncated: 2 more columns]

## Sheet: bab2
hs_bab2	wRNAi_GSC	wRNAi_region 1	wRNAi_2A	wRNAi_2B	wRNAi_st1-2	wRNAi_st3-4	wRNAi_st5	wRNAi_st6	wRNAi_st7	wRNAi_st8	wRNAi_st9	wRNAi_st10		ezRNAi2_GSC	ezRNAi2_region 1	ezRNAi2_2A	ezRNAi2_2B	ezRNAi2_st1-2	ezRNAi2_st3-4	ezRNAi2_st5	ezRNAi2_st6	ezRNAi2_st7	ezRNAi2_st8	ezRNAi2_st9	ezRNAi2_st10
	2562	5075	1589	1299	2011	2795	2905	3706	3580	2511	1991	1534		1892.89	3418.38	2354.83	1915.66	1858.29	5732.09	7881.36	7110.43	9812.04	11648.6	10300.9	11640.8
	2617	3688	1712	1941	2419	2429	4154	3918	3072	3261	1412	1666		2948.06	3322.23	1886.39	2795.08	2819.92	3925.33	8263.82	8897.38	10995.4	11557.2	12363.9	8741.94
	1965	5425	1631	1689	1826	1852	3670	3756	4712	2554	1380	1577		2933.25	3932.17	2610.76	1909.91	2305.88	4882.85	7171.91	8546.16	10755.7	10918	10737.3	12066.7
	1848	5907	1483	2353	2079	1970	4677	3792	3155	2023	1528	1302		2150.57	4381.29	2190.38	2121.49	1979.28	6863.57	5619.16	7977.23	9544.78	12377.4	10085.8	9476.19
	2333	3443		2422	1482	2961	3874	4515	3157	3825	1957	1332		2862.96	3989.26	1953.52	2168.59	2394.13	4011.75	5706.67	7946.17	11020.3	11074.2	10076.9
	1798	4417		2216	1726	3047	3603	3875	2838	3076	2119	1578			4189.24					5800.31	7566.52	10474.9	10215.3
	3056	4097		1649	2044	2270	4178	3586	3355	3197	2190	1244			4761.41					7083.44	7424.07	9455.38	12000.1
	2477				1476	1993	3453	5296	2258	3367	2868	1462			4812.48
						2274	3116	4082	3186	2421	1801
						3024	3761	4247	4219	2924	1871
						2915	3727	3247	3647	2864
						1819	3769	3866	4209
						1699	3891		4085
						1453	3909		3862
						2981			3893
									4180
									3407
nohs_bab2	239	232	204	218	408	453	513	578	557	668	783	414		213.423	225.058	235.244	198.403	212.699	234.444	481.186	837.677	1010.86	1373.96	1983.49	1610.47
	204	187	215	215	276	368	477	414	539	645	981	699		191.758	188.872	226.258	198.443	259.756	376.301	492.732	917.995	855.839	1524.66	1157.96	1520.26
	211	200	205	199	404	457	454	638	572	558	499	644		224.911	223.725	195.213	189.82	260.759	354.678	421.45	865.698	901.598	1255.36	1971.38
					396	396	368	649	645	893	939	699										659.161		2187.13
					261	481	666	675	581	815	548	478
						516	461	535	804	641	726
							653	679	513	863
								664	773	856
									890	627
									663	783
										718
										704
										745
nohs_avg	218	206.333	208	210.667	349	445.167	513.143	604	653.7	732	746	586.8		210.031	212.552	218.905	195.555	244.405	321.808	465.123	873.79	856.863	1384.66	1824.99	1565.37
hs_bab2_backgroundsubtract	wRNAi_GSC	wRNAi_region 1	wRNAi_2A	wRNAi_2B	wRNAi_st1-2	wRNAi_st3-4	wRNAi_st5	wRNAi_st6	wRNAi_st7	wRNAi_st8	wRNAi_st9	wRNAi_st10		ezRNAi2_GSC	ezRNAi2_region 1	ezRNAi2_2A	ezRNAi2_2B	ezRNAi2_st1-2	ezRNAi2_st3-4	ezRNAi2_st5	ezRNAi2_st6	ezRNAi2_st7	ezRNAi2_st8	ezRNAi2_st9	ezRNAi2_st10
	2344	4869	1381	1088	1662	2350	2392	3102	2927	1779	1245	947		1682.89	3205.38	2135.83	1719.66	1614.29	5410.09	7416.36	6236.43	8955.04	10263.6	8475.91	10075.8
	2399	3482	1504	1730	2070	1984	3641	3314	2419	2529	666	1079		2738.06	3109.23	1667.39	2599.08	2575.92	3603.33	7798.82	8023.38	10138.4	10172.2	10538.9	7176.94
	1747	5219	1423	1478	1477	1407	3157	3152	4059	1822	634	990		2723.25	3719.17	2391.76	1713.91	2061.88	4560.85	6706.91	7672.16	9898.7	9532.97	8912.31	10501.7
	1630	5701	1275	2142	1730	1525	4164	3188	2502	1291	782	715		1940.57	4168.29	1971.38	1925.49	1735.28	6541.57	5154.16	7103.23	8687.78	10992.4	8260.75	7911.19
	2115	3237		2211	1133	2516	3361	3911	2504	3093	1211	745		2652.96	3776.26	1734.52	1972.59	2150.13	3689.75	5241.67	7072.17	10163.3	9689.17	8251.95
	1580	4211		2005	1377	2602	3090	3271	2185	2344	1373	991			3976.24					5335.31	6692.52	9617.9	8830.32
	2838	3891		1438	1695	1825	3665	2982	2702	2465	1444	657			4548.41					6618.44	6550.07	8598.38	10615.1
	2259				1127	1548	2940	4692	1605	2635	2122	875			4599.48
						1829	2603	3478	2533	1689	1055
						2579	3248	3643	3566	2192	1125
						2470	3214	2643	2994	2132
						1374	3256	3262	3556
						1254	3378		3432
						1008	3396		3209
						2536			3240
									3527
									2754
AVERAGE	2114	4372.86	1395.75	1727.43	1533.88	1920.47	3250.36	3386.5	2924.35	2179.18	1165.7	874.875		2347.54	3887.81	1980.18	1986.15	2027.5	4761.12	6324.53	7050	9437.07	10013.7	8887.97	8916.41
STDEV	436.451	919.081	95.3218	415.856	321.24	552.518	438.264	520.44	614.101	509.247	439.294	152.833		498.581	553.19	296.603	362.17	378.526	1236.89	1089.28	629.482	678.502	723.857	960.985	1622.1

## Sheet: stg
hs_stg	wRNAi_GSC	wRNAi_region 1	wRNAi_2A	wRNAi_2B	wRNAi_st1-2	wRNAi_st3-4	wRNAi_st5	wRNAi_st6	wRNAi_st7	wRNAi_st8	wRNAi_st9	wRNAi_st10		ezRNAi2_GSC	ezRNAi2_region 1	ezRNAi2_2A	ezRNAi2_2B	ezRNAi2_st1-2	ezRNAi2_st3-4	ezRNAi2_st5	ezRNAi2_st6	ezRNAi2_st7	ezRNAi2_st8	ezRNAi2_st9	ezRNAi2_st10
	2765	4527	2001	2226	3080	5443	9251	12620	9558	8481	7107	5388		2576.84	5106.36	2017.25	3282.29	3319.02	4634.2	6420.35	11413.2	9458.83	10747.4	9381.68	6957.12
	2432	3523	3354	2344	4057	6997	7739	11302	8656	8723	7686	5283		2398.99	6472.41	2745.27	3194.16	2791.51	5083.68	8921.11	11527.1	10300.6	8987.21	10710.2	7039.43
	2500	5027	2107	2723	3226	6520	5120	12548	10491	8310	9347	6015		2951.45	3277.28	2381.07	3452.56	3411.25	4172.58	8593.22	11773.6	11719	12753.2
	2308	3929	2163	2500	2975	5872	7734	11969	10771	7712	7677	5224		2386.95	3844.69	2454.6	2615.45	3151.59	5248.78	7695.08	10888.1	13066.9	10176.2
	2638	4286	2065	2364	3477	3824	8331	9003	9926	10151	6450	5019						3807.14	3772.78	9488.33	10498.8	12376.1	12428.7
	2820		2950	2192	4290	6279	8693	7707	9532	10151	7798	5792							5009.17	6221.37		13355.8
	2356				4652	7078	9410	8778	10151	9208	7585	5455							7220.2	7053.88		10503.7
					3799	8172	8127	9458		9621	9142	6891							6724.05	6559.25		13176.7
						7868	8380	14086											5061.65	7009.59
						5704	8399
						7457	8951
						4606	6398
nohs_stg	1205	839	1309	1322	1857	2625	3558	4528	4407	4595	3343	2546		1030.98	1180.78	1216.81	1919.04	2130.86	2392.4	2839.83	3962.86	4452.27	4542.16	5067.71	3304.87
	1027	1066	1505	1437	1780	2181	3537	3168	4807	3315	2552	2701		1100.85	1131.63	1164.48	1342.35	2390.55	2835.09	2424.91	2402.44	5329.31	4260.39	3886.63	4577.28
	1048	1148	1196	954	1433	2239	3579	2660	4746	3514	2498	1781		1074.52	1001.1	1014.57	1591.14	2368.82	2417.46	4017.77	4745.39	5188.68	5894.74	6436.84
	856			1409	1578	2629		4438	4618	3384	3127						2270.6	2154.45	2257.19	4468.71	3470	5001.2	5360.96	4347.6
				1448	1915	2486		3737	3679	4604	2354							1963.79		2950.87	3331.43	4099.76	4455.18
				1061				4101		3902	2517									3289.99	2744.27	5061.23	6107.46
																				3021.11
nohs_avg	1034	1017.67	1336.67	1271.83	1712.6	2432	3558	3772	4451.4	3885.67	2731.83	2342.67		1068.78	1104.5	1131.95	1780.78	2201.69	2475.53	3287.6	3442.73	4855.41	5103.48	4934.7	3941.08
hs_stg_backgroundsubtract	wRNAi_GSC	wRNAi_region 1	wRNAi_2A	wRNAi_2B	wRNAi_st1-2	wRNAi_st3-4	wRNAi_st5	wRNAi_st6	wRNAi_st7	wRNAi_st8	wRNAi_st9	wRNAi_st10		ezRNAi2_GSC	ezRNAi2_region 1	ezRNAi2_2A	ezRNAi2_2B	ezRNAi2_st1-2	ezRNAi2_st3-4	ezRNAi2_st5	ezRNAi2_st6	ezRNAi2_st7	ezRNAi2_st8	ezRNAi2_st9	ezRNAi2_st10
	1731	3509	664	954	1367	3011	5693	8848	5107	4595	4375	3045		1507.84	4001.36	885.246	1501.29	1117.02	2158.2	3132.35	7970.22	4603.83	5644.4	4446.68	3016.12
	1398	2505	2017	1072	2344	4565	4181	7530	4205	4837	4954	2940		1329.99	5367.41	1613.27	1413.16	589.506	2607.68	5633.11	8084.11	5445.64	3884.21	5775.17	3098.43
	1466	4009	770	1451	1513	4088	1562	8776	6040	4424	6615	3672		1882.45	2172.28	1249.07	1671.56	1209.25	1696.58	5305.22	8330.61	6864.01	7650.24
	1274	2911	826	1228	1262	3440	4176	8197	6320	3826	4945	2881		1317.95	2739.69	1322.6	834.45	949.585	2772.78	4407.08	7445.1	8211.9	5073.24
	1604	3268	728	1092	1764	1392	4773	5231	5475	6265	3718	2676						1605.14	1296.78	6200.33	7055.83	7521.09	7325.66
	1786		1613	920	2577	3847	5135	3935	5081	6265	5066	3449							2533.17	2933.37		8500.76
	1322				2939	4646	5852	5006	5700	5322	4853	3112							4744.2	3765.88		5648.67
					2086	5740	4569	5686		5735	6410	4548							4248.05	3271.25		8321.66
						5436	4822	10314											2585.65	3721.59
						3272	4841
						5025	5393
						2174	2840
AVERAGE	1511.57	3240.4	1103	1119.5	1981.5	3886.33	4486.42	7058.11	5418.29	5158.62	5117	3290.38		1509.56	3570.19	1267.55	1355.11	1094.1	2738.12	4263.35	7777.17	6889.69	5915.55	5110.92	3057.27
STDEV	199.731	572.925	568.588	195.892	606.611	1304.21	1218.91	2163.95	702.96	889.921	967.476	599.077		263.314	1421.24	299.472	363.302	370.959	1111.66	1188.88	516.812	1494.96	1573.76	939.384	58.2027

## Sheet: E2f
hs_e2f	wRNAi_GSC	wRNAi_region 1	wRNAi_2A	wRNAi_2B	wRNAi_st1-2	wRNAi_st3-4	wRNAi_st5	wRNAi_st6	wRNAi_st7	wRNAi_st8	wRNAi_st9	wRNAi_st10		ezRNAi2_GSC	ezRNAi2_region 1	ezRNAi2_2A	ezRNAi2_2B	ezRNAi2_st1-2	ezRNAi2_st3-4	ezRNAi2_st5	ezRNAi2_st6	ezRNAi2_st7	ezRNAi2_st8	ezRNAi2_st9	ezRNAi2_st10
	1654	3368	2194	1825	3779	4833	4559	7477	9011	10685	8051	8745		1952.89	3156.89	1688.33	2655.96	3036.92	5273.37	6518.7	8734.38	10591.8	13555.1	11032.3	8049.91
	3901	7432	1119	2635	3066	4375	6067	7525	8727	8690	8678	7002		2333.88	4195	2333.88	1891.44	4033.68	3821.27	6394.94	6651.81	12129.4	13416	13953.6	9720.6
	2472	4680	1340	1905	2832	5728	6596	6426	7730	9742	9358	7521		2039.36	3705.31	2074.14	2942.47	2423.39	4389.51	5865.01	9228.3	11347.5	14363.4	9705.86	8856.12
	2654	2503	1543	1645	3674	4247	5183	7987	8361	8980	8793	7204		3338.81	6351.37	1905.19	2529.48	3520.89	4284.89		9205.17	13163.5	12933.3	11422.1	11458.6
	3451	8331	1441	1779	2429	3703	6015	8048	9558	9756	10072	8589		3229.33	5667.95		2877.91	2593.78			9796.45	9405.39	12251.8	9999.94	8518.76
		3152	2043	1450	2705	4312	4449	6725	8244	8825	7751				6437.24		2464.58	3452.54			9781.51	12257.3		12004.1	9840.43
		2661	1547	1876	2031	4570	6012	8068	9543	8764	7372						2877.64					13790.8		9888.96
		3541		1776	2005	5295	7303	8409	7066	11954												10120.6		10910.4
		4800		1599	2772	3900	6730	8540	7474	10204														11582.3
								7013	8800															11577.3
								7395	7848
									7926
									9354
									7200
									8749
nohs_e2f	250	260	291	302	364	613	1090	1114	2605	4210	4361	3644		458.928	509.859	530.326	649.168	854.078	803.898	1519.34	2149.92	4408	7198.32	6199.37	5851.85
	211	243	233	287	532	695	1060	1181	1954	3437	4048	2588		383.633	419.337	446.918	695.597	564.643	1279.28	1821.44	2384.16	4663.27	6775.31	5668	4752.1
	275	262	297	362	394	743	1188	1603	1811	4372	4696	3189		485.086	458.736	529.217	551.934	847.789	1257.14	1618.68	3242.02	4934.38	5878.33	6283.47
									1779	3143		4375									2707.78	4781.79	5942.99	6137.84
									2665	3373											2082.81	6138.12	5715.19	7122.97
									1924												2380.61
nohs_avg	245.333	255	273.667	317	430	683.667	1112.67	1299.33	2123	3707	4368.33	3449		442.549	462.644	502.154	632.233	755.503	1113.44	1653.15	2491.22	4985.11	6302.03	6282.33	5301.97
hs_e2f_backgroundsubtract	wRNAi_GSC	wRNAi_region 1	wRNAi_2A	wRNAi_2B	wRNAi_st1-2	wRNAi_st3-4	wRNAi_st5	wRNAi_st6	wRNAi_st7	wRNAi_st8	wRNAi_st9	wRNAi_st10		ezRNAi2_GSC	ezRNAi2_region 1	ezRNAi2_2A	ezRNAi2_2B	ezRNAi2_st1-2	ezRNAi2_st3-4	ezRNAi2_st5	ezRNAi2_st6	ezRNAi2_st7	ezRNAi2_st8	ezRNAi2_st9	ezRNAi2_st10
	1409	3113	1920	1508	3349	4149	3446	6178	6888	6978	3683	5296		1509.89	2693.89	1186.33	2023.96	2280.92	4160.37	4865.7	6243.38	5606.77	7253.12	4750.27	2747.91
	3656	7177	845	2318	2636	3691	4954	6226	6604	4983	4310	3553		1890.88	3732	1831.88	1259.44	3277.68	2708.27	4741.94	4160.81	7144.41	7114.04	7671.6	4418.6
	2227	4425	1066	1588	2402	5044	5483	5127	5607	6035	4990	4072		1596.36	3242.31	1572.14	2310.47	1667.39	3276.51	4212.01	6737.3	6362.53	8061.42	3423.86	3554.12
	2409	2248	1269	1328	3244	3563	4070	6688	6238	5273	4425	3755		2895.81	5888.37	1403.19	1897.48	2764.89	3171.89		6714.17	8178.49	6631.26	5140.06	6156.62
	3206	8076	1167	1462	1999	3019	4902	6749	7435	6049	5704	5140		2786.33	5204.95		2245.91	1837.78			7305.45	4420.39	5949.85	3717.94	3216.76
		2897	1769	1133	2275	3628	3336	5426	6121	5118	3383				5974.24		1832.58	2696.54			7290.51	7272.32		5722.09	4538.43
		2406	1273	1559	1601	3886	4899	6769	7420	5057	3004						2245.64					8805.75		3606.96
		3286		1459	1575	4611	6190	7110	4943	8247												5135.62		4628.45
		4545		1282	2342	3216	5617	7241	5351	6497														5300.28
								5714	6677															5295.27
								6096	5725
									5803
									7231
									5077
									6626
AVERAGE	2581.4	4241.44	1329.86	1515.22	2380.33	3867.44	4766.33	6302.18	6222.86	6026.33	4214.14	4363.2		2135.86	4455.96	1498.39	1973.64	2420.87	3329.26	4606.55	6408.6	6615.79	7001.93	4925.68	4105.41
STDEV	876.746	2085.17	382.814	334.15	628.885	646.352	975.276	682.555	842.976	1088.57	940.978	803.844		660.219	1415.62	272.703	365.121	609.228	606.606	347.24	1171.61	1513.81	781.416	1250.31	1218.97

## Sheet: Rbp6
hs_rbp6	wRNAi_GSC	wRNAi_region 1	wRNAi_2A	wRNAi_2B	wRNAi_st1-2	wRNAi_st3-4	wRNAi_st5	wRNAi_st6	wRNAi_st7	wRNAi_st8	wRNAi_st9	wRNAi_st10		ezRNAi2_GSC	ezRNAi2_region 1	ezRNAi2_2A	ezRNAi2_2B	ezRNAi2_st1-2	ezRNAi2_st3-4	ezRNAi2_st5	ezRNAi2_st6	ezRNAi2_st7	ezRNAi2_st8	ezRNAi2_st9	ezRNAi2_st10
	1679	2405	1096	777	1168	1261	1953	2632	1168	840	874	641		1632.61	3077.07	1986.62	2094.39	1730.78	2330.49	2917.06	4650.59	9051.17	8027.59	5743.94	7399.59
	1389	2544	907	914	661	1279	2092	2758	1457	670	1078	757		1775.83	2334.41	1721.64	1665.04	2486.4	2596.46	3315.83	6036.51	7973.75	6632.38	6885.06	5837.68
	2017	2611	874	506	415	1350	2160	2639	1167	805	1531	488		1258.2	3136.12	1777.63	1931.93	2618.1	3141.87	4775.99	5492.46	9235.98	7912.23	6758.01	7327.06
	1337	3081	1030	1126	985	1068	2057	1999	1898	1005	858	404		1129	3046.02	2074.28	2340.84	3090.64	4316.12	4588.9	5494.26	5351.31	8436.67	5454.87	7372.61
	1369	5403	1224	1123	1114	1321	1826	2041	1415	1004	995			1577.51	3596.57	1470.74	1910.38	1856.26	3274.87	3561.1	5375.32	6555.74	7506.76
	1543	4103	940	975	1043	1185	2280	2310	1151	1088	1825				3227.39	1775.84	1884.77	2222.13	4033.08	2825.94	4678.9	6850.01
	1469	5848	1127	1044	1238	988	2686	3402	1136	1096	1338					1829.75	1727.24	1754.18	3272.66	3451.37	5007.07	5727.9
	1633	3154		1110	898	986		2068	1767	1144	1292							1505.96	3461.64		5593.71
	1532	3535		1079	681	1441		2916	1627	1204	933							1535.31	4081.01		6351.3
		3188			1162			2441	1673	935	962								2274.05		4576.42
								2533	1448	1175									2557.15		4523.16
								1920	1832	852									4035.01		5313.14
								2619	1872	688									2527.73		4978.38
									1784	835									3195.42
										1134									2109.56
										695									2349.56
										1040									2856.82
										1078
nohs_rbp6	190	180	179	185	228	209	221	412	466	403	437	286		188.88	177.527	160.585	189.045	192.239	159.115	168.249	232.425	191.307	289.372	740.84	1080.73
	249	184	205	203	263	231	432	373	427	480	414	482		210.91	228.045	190.328	207.329	227.889	187.458	269.962	238.859	326.934	471.157
	174	185	214	223	216	247	304	349	531	344	450	486		178.865	208.741	242.505	166.783	216.107	148.07	245.651	180.911	277.553
						423	340	516	717	295	435	340
						244	280	399	490	348
						249		460	334	389
						333		284	257
						358		496	346
								619
								598
nohs_avg	204.333	183	199.333	203.667	235.667	286.75	315.4	450.6	446	376.5	434	398.5		192.885	204.771	197.806	187.719	212.078	164.881	227.954	217.398	265.265	380.264	740.84	1080.73
hs_rbp6_backgroundsubtract	wRNAi_GSC	wRNAi_region 1	wRNAi_2A	wRNAi_2B	wRNAi_st1-2	wRNAi_st3-4	wRNAi_st5	wRNAi_st6	wRNAi_st7	wRNAi_st8	wRNAi_st9	wRNAi_st10		ezRNAi2_GSC	ezRNAi2_region 1	ezRNAi2_2A	ezRNAi2_2B	ezRNAi2_st1-2	ezRNAi2_st3-4	ezRNAi2_st5	ezRNAi2_st6	ezRNAi2_st7	ezRNAi2_st8	ezRNAi2_st9	ezRNAi2_st10
	1475	2222	897	573	932	974	1638	2181	722	463	440	242		1439.61	2872.07	1788.62	1906.39	1518.78	2165.49	2689.06	4433.59	8786.17	7647.59	5002.94	6318.59
	1185	2361	708	710	425	992	1777	2307	1011	293	644	358		1582.83	2129.41	1523.64	1477.04	2274.4	2431.46	3087.83	5819.51	7708.75	6252.38	6144.06	4756.68
	1813	2428	675	302	179	1063	1845	2188	721	428	1097	89		1065.2	2931.12	1579.63	1743.93	2406.1	2976.87	4547.99	5275.46	8970.98	7532.23	6017.01	6246.06
	1133	2898	831	922	749	781	1742	1548	1452	628	424	5		936.003	2841.02	1876.28	2152.84	2878.64	4151.12	4360.9	5277.26	5086.31	8056.67	4713.87	6291.61
	1165	5220	1025	919	878	1034	1511	1590	969	627	561			1384.51	3391.57	1272.74	1722.38	1644.26	3109.87	3333.1	5158.32	6290.74	7126.76
	1339	3920	741	771	807	898	1965	1859	705	711	1391				3022.39	1577.84	1696.77	2010.13	3868.08	2597.94	4461.9	6585.01
	1265	5665	928	840	1002	701	2371	2951	690	719	904					1631.75	1539.24	1542.18	3107.66	3223.37	4790.07	5462.9
	1429	2971		906	662	699		1617	1321	767	858							1293.96	3296.64		5376.71
	1328	3352		875	445	1154		2465	1181	827	499							1323.31	3916.01		6134.3
		3005			926			1990	1227	558	528								2109.05		4359.42
								2082	1002	798									2392.15		4306.16
								1469	1386	475									3870.01		5096.14
								2168	1426	311									2362.73		4761.38
									1338	458									3030.42
										757									1944.56
										318									2184.56
										663									2691.82
										701
AVERAGE	1348	3404.2	829.286	757.556	700.5	921.778	1835.57	2031.92	1082.21	583.444	734.6	173.5		1281.63	2864.6	1607.22	1748.37	1876.86	3056.26	3405.74	5019.25	6984.41	7323.13	5469.47	5903.23
STDEV	209.931	1188.8	128.417	206.084	269.809	163.126	276.915	420.883	288.372	175.516	320.748	157.337		270.447	411.859	194.244	227.039	547.722	697.936	766.25	569.028	1542.51	684.132	717.278	764.956

## Sheet: Ets98B
hs_ets98B	wRNAi_GSC	wRNAi_region 1	wRNAi_2A	wRNAi_2B	wRNAi_st1-2	wRNAi_st3-4	wRNAi_st5	wRNAi_st6	wRNAi_st7	wRNAi_st8	wRNAi_st9	wRNAi_st10		ezRNAi2_GSC	ezRNAi2_region 1	ezRNAi2_2A	ezRNAi2_2B	ezRNAi2_st1-2	ezRNAi2_st3-4	ezRNAi2_st5	ezRNAi2_st6	ezRNAi2_st7	ezRNAi2_st8	ezRNAi2_st9	ezRNAi2_st10
	1587	3598	1159	1194	1430	1937	2607	2381	1866	1003	596	438		1351	2139.17	913	1353	2272	3339	2379	4337	5197.89	5067.62	4148.56	5393.73
	2206	3781	1397	1011	1694	1989	2559	2945	1920	805	787	517		1330	2300.75	1692	958	2084	2290	3282	4410	5132.53	4023.22	3704.63	4622.33
	2068	2682	1284	916	1176	1298	2013	2886	1238	910	685	461		2301	3654.61	1278	1282	1716	3592	4323	6398	6380	5359.69	4278.55
	2115	3492	1733	908	1370	1912	2105	2386	1632	898	801	392		1385	2075.17	1391	1622	1931	3464	3863	6094	6235.07		3741.23
	1750	2732	1475	1137	1759	2217	2293	3052	975	1092	450	516		1775	2302.47	1426	1483	2992	2659	4512	4856	4371.87
	1749	3475	1342	1278	1633	2656	2019	3762	1234	740	514	451			2432.44	1273	1338	2262	2558		5291	4208.28
	1412		1147	1368	1657	2496	2647	2358	1623	827	917	499			2673.74	1776	1349	2739	2102		4471	6680.09
	1421			1005	1338	1661	2226	2371	1626	1067	537	384			2042.05		1541	1329	2552		4957	5118.66
				826	1901	1741	2225	2582	1652	1095	682	369			2213.25		1758	2200	2580			6775.56
					1292	1641	2528	2717	1958	798	915				2389.15				2344			5630.62
					1314	2591		2734	1758	724	512				2528.61				2476			4971.61
					1426	1794		2741	1283	973	504				2786.1				2370			4932.82
						1808		2264	1548	817	609											6759.78
						1360		2645	931	1178	499											4905.14
								2053	1367	948
										941
										744
										712
nohs_ets98B	152	160	159	189	315	223	427	493	365	327	243	252		188	195	259	287	692	339	880	1520	1569	1041	979	537
	197	182	200	174	221	351	415	488	253	324	336	204		213	161	202	246	546	660	1100	1453	911	926	766
	171	183	172	177	321	375	429	494	285	336	255	238		144	281	235	226	244	672	589	1556	2168	1164	724
	191		207	176	258	340	496	401	341	302	243	211		177	170	182	228	436	430	960	1708	1403	1184
											261							269	348	898	1640	1911	2375
																			363		1563	2012	1060
																					1454	2100
nohs_avg	177.75	175	184.5	179	278.75	322.25	441.75	469	311	322.25	267.6	226.25		180.5	201.75	219.5	246.75	437.4	468.667	885.4	1556.29	1724.86	1291.67	823	537
hs_ets98B_backgroundsubtract	wRNAi_GSC	wRNAi_region 1	wRNAi_2A	wRNAi_2B	wRNAi_st1-2	wRNAi_st3-4	wRNAi_st5	wRNAi_st6	wRNAi_st7	wRNAi_st8	wRNAi_st9	wRNAi_st10		ezRNAi2_GSC	ezRNAi2_region 1	ezRNAi2_2A	ezRNAi2_2B	ezRNAi2_st1-2	ezRNAi2_st3-4	ezRNAi2_st5	ezRNAi2_st6	ezRNAi2_st7	ezRNAi2_st8	ezRNAi2_st9	ezRNAi2_st10
	1409	3423	974	1015	1151	1615	2165	1912	1555	681	328	212		1170	1937.17	693	1106	1835	2870	1494	2781	3472.89	3775.62	3325.56	4856.73
	2028	3606	1212	832	1415	1667	2117	2476	1609	483	519	291		1149	2098.75	1472	711	1647	1821	2397	2854	3407.53	2731.22	2881.63	4085.33
	1890	2507	1099	737	897	976	1571	2417	927	588	417	235		2120	3452.61	1058	1035	1279	3123	3438	4842	4655	4067.69	3455.55
	1937	3317	1548	729	1091	1590	1663	1917	1321	576	533	166		1204	1873.17	1171	1375	1494	2995	2978	4538	4510.07		2918.23
	1572	2557	1290	958	1480	1895	1851	2583	664	770	182	290		1594	2100.47	1206	1236	2555	2190	3627	3300	2646.87
	1571	3300	1157	1099	1354	2334	1577	3293	923	418	246	225			2230.44	1053	1091	1825	2089		3735	2483.28
	1234		962	1189	1378	2174	2205	1889	1312	505	649	273			2471.74	1556	1102	2302	1633		2915	4955.09
	1243			826	1059	1339	1784	1902	1315	745	269	158			1840.05		1294	892	2083		3401	3393.66
				647	1622	1419	1783	2113	1341	773	414	143			2011.25		1511	1763	2111			5050.56
					1013	1319	2086	2248	1647	476	647				2187.15				1875			3905.62
					1035	2269		2265	1447	402	244				2326.61				2007			3246.61
					1147	1472		2272	972	651	236				2584.1				1901			3207.82
						1486		1795	1237	495	341											5034.78
						1038		2176	620	856	231											3180.14
								1584	1056	626
										619
										422
										390
AVERAGE	1610.5	3118.33	1177.43	892.444	1220.17	1613.79	1880.2	2232.71	1206.43	582	375.429	221.444		1447.4	2259.46	1172.71	1162.33	1732.44	2224.83	2786.8	3545.75	3796.42	3524.84	3145.24	4471.03
STDEV	311.559	467.319	202.3	183.411	222.425	422.394	244.79	390.469	333.068	143.015	157.81	56.7166		418.067	439.664	287.288	229.504	499.64	491.463	864.556	778.569	885.775	702.639	288.577	545.458

## Sheet: blimp1
hs_blimp1	wRNAi_GSC	wRNAi_region 1	wRNAi_2A	wRNAi_2B	wRNAi_st1-2	wRNAi_st3-4	wRNAi_st5	wRNAi_st6	wRNAi_st7	wRNAi_st8	wRNAi_st9	wRNAi_st10		ezRNAi2_GSC	ezRNAi2_region 1	ezRNAi2_2A	ezRNAi2_2B	ezRNAi2_st1-2	ezRNAi2_st3-4	ezRNAi2_st5	ezRNAi2_st6	ezRNAi2_st7	ezRNAi2_st8	ezRNAi2_st9	ezRNAi2_st10
	2917	5051	1257	1361	1052	2222	1899	2922	1730	912	770	666		2065.8	4384.03	2257.53	2370.36	2172.73	2547.26	5369.42	5646.5	6075.51	6132.22	3675.68	3065.72
	2747	4259	1245	1074	1353	1150	2078	3097	1600	710	670	655		2155.14	3058.9	1687.33	2578.23	2197.23	3398.98	4888.75	4990.31	6080.89	5545.19	5205.37	4173.71
	2346	3584	1342	1207	1588	1498	2411	2668	1179	1319	650	767		2019.51	5108.93	1422.96	1695.82	2647.06	2900.32	3674.46	5115.11	7657.88	4441.51		4843.85
	1853	4379	1728	1436	967	2110	2401	2981	1566	1210	669	544		2126.14		1380.48	1977.39	2274.96	2728.31	3462.93	4958.02	4680.2	5623.02
	2081	4000	1781	1174	1810	1566	2745	3444	2188	717	665	629		1919.46			2065.8	2613.59	2590.31				4986.15
	2701	3975	2442	1428	1288	2256	2278	3748	2352	1196	568							2116.65	3321.64
	1761		2002	1165	1786	1664	2730	3010	2079	737	670							3023.22
	2258			1255	1418	2299	2300	3407	1885	1182	701
	1994			1324	1024	2293	2326	3237	1046	1098
				1531	1229	1654	2174	2380	2106	1256
					1493	1459	3551	2863	2127	1070
							2737	3217	1191	1460
							3042	3949	1447	1140
							3131	3300	2677
							2282
							3431
							2706
nohs_blimp1	212	226	241	117	261	366	447	470	363	304	320	264		264.61	205.267	436.979	264.904	469.365	384.64	730.653	913.619	648.495	641.423	1041.03	1370.37
	174	169	162	152	361	277	424	416	395	318	292	220		266.152	256.98	283.744	299.944	309.461	413.956	549.778	887.386	820.511	987.536	1317.61	1062.56
	130	178	190	173	177	277	327	329	438	307	248	217		235.711	283.726	248.607	379.096	312.57	465.981	389.367	728.096	674.056	1347.4	1450.39	1232.71
	145	176	197	195	196	375	283	277	249									320.264	517.818	354.489	765.187	728.481	1045.14	1288.53	1606.3
	212				195		342	305	309										501.761	432.678	804.002		918.161
								281	369
nohs_avg	174.6	187.25	197.5	159.25	238	323.75	364.6	346.333	353.833	309.667	286.667	233.667		255.491	248.658	323.11	314.648	352.915	456.831	491.393	819.658	717.886	987.933	1274.39	1317.98
hs_blimp1_backgroundsubtract	wRNAi_GSC	wRNAi_region 1	wRNAi_2A	wRNAi_2B	wRNAi_st1-2	wRNAi_st3-4	wRNAi_st5	wRNAi_st6	wRNAi_st7	wRNAi_st8	wRNAi_st9	wRNAi_st10		ezRNAi2_GSC	ezRNAi2_region 1	ezRNAi2_2A	ezRNAi2_2B	ezRNAi2_st1-2	ezRNAi2_st3-4	ezRNAi2_st5	ezRNAi2_st6	ezRNAi2_st7	ezRNAi2_st8	ezRNAi2_st9	ezRNAi2_st10
	2742	4864	1059	1202	814	1898	1534	2576	1376	602	483	432		1810.8	4135.03	1934.53	2055.36	1819.73	2090.26	4878.42	4826.5	5357.51	5144.22	2401.68	1747.72
	2572	4072	1047	915	1115	826	1713	2751	1246	400	383	421		1900.14	2809.9	1364.33	2263.23	1844.23	2941.98	4397.75	4170.31	5362.89	4557.19	3931.37	2855.71
	2171	3397	1144	1048	1350	1174	2046	2322	825	1009	363	533		1764.51	4859.93	1099.96	1380.82	2294.06	2443.32	3183.46	4295.11	6939.88	3453.51		3525.85
	1678	4192	1530	1277	729	1786	2036	2635	1212	900	382	310		1871.14		1057.48	1662.39	1921.96	2271.31	2971.93	4138.02	3962.2	4635.02
	1906	3813	1583	1015	1572	1242	2380	3098	1834	407	378	395		1664.46			1750.8	2260.59	2133.31				3998.15
	2526	3788	2244	1269	1050	1932	1913	3402	1998	886	281							1763.65	2864.64
	1586		1804	1006	1548	1340	2365	2664	1725	427	383							2670.22
	2083			1096	1180	1975	1935	3061	1531	872	414
	1819			1165	786	1969	1961	2891	692	788
				1372	991	1330	1809	2034	1752	946
					1255	1135	3186	2517	1773	760
							2372	2871	837	1150
							2677	3603	1093	830
							2766	2954	2323
							1917
							3066
							2341
AVERAGE	2120.33	4021	1487.29	1136.5	1126.36	1509.73	2236.29	2812.79	1444.07	767.462	383.375	418.2		1802.21	3934.95	1364.07	1822.52	2082.06	2457.47	3857.89	4357.48	5405.62	4357.62	3166.52	2709.76
STDEV	414.866	495.867	443.29	144.602	290.07	410.635	469.758	410.676	485.106	240.094	55.7928	80.0356		93.2904	1039.55	403.807	344.356	335.447	367.51	926.055	319.929	1216.76	648.489	1081.66	898.005

## Sheet: blimp1_en
hs_blimp1_en_3	wRNAi_GSC	wRNAi_region 1	wRNAi_2A	wRNAi_2B	wRNAi_st1-2	wRNAi_st3-4	wRNAi_st5	wRNAi_st6	wRNAi_st7	wRNAi_st8	wRNAi_st9	wRNAi_st10		ezRNAi2_GSC	ezRNAi2_region 1	ezRNAi2_2A	ezRNAi2_2B	ezRNAi2_st1-2	ezRNAi2_st3-4	ezRNAi2_st5	ezRNAi2_st6	ezRNAi2_st7	ezRNAi2_st8	ezRNAi2_st9	ezRNAi2_st10
	1801	4004	1668	1085	1162	1803	2058	1575	562	622	457	376		2536	4807	2069	2160	2291	3358	4959	4485	4776	9965	10399	8674
	1553	3377	1478	1566	1550	1971	2526	1540	1113	566	458	457		2296	2967	2234	2209	2225	2958	4231	4970	6593	9919	10528	8719
	1894	2985	1417	1596	1539	2021	2271	1821	898	687	503	565		2530	3903	1829	2384	2572	2146	5007	5439	5060	6242
	1457	4280	1809	764	1267	1413	1581	1170	1018	494	475			2459	4414	1420	2577	2145	2623	5077	5205	9160	6687
	1678	3693	1682	1596	818	1443	1743	1471	683	556	463			2082	3105	1616	2092	1732	2712	5160	5652
	2367	3453	1270	1149	965	1472	1634	1369	1116	558	456			1595	4427		1927	1880	2463	4287	5607
	1981	4374	1266	1368	1372	1368	2795	1500	948	621				1703	3484		2039	2752	2769		4358
	1651	4600			1397	1464	1797	1593	1652	555				1323	2807		1849	2259	3344		5083
	1775	3486			820	1866	3075	2163	1095	511				1701			1726	2334
	1937	3519			754	2296	3122		916	630
	1807	4999					1945		1395	439
	1521	4628					2697		977	735
		4796								548
		4579								540
nohs_blimp1_en_3	186	172	206	229	244	268	371	359	355	357	308	308		287.167	247.073	229.426	230.07	445.408	588.377	1379.12	1493.33	1553.32	2459.59	2627.48	3092.39
	180	207	227	243	309	384	358	398	368	377	368	368		250	322.307	236.386	250.936	355	399.261	1046.84	1742.68	2365.44	2331.09	2693.87	3285.25
	169	191	215	205	250	308	389	380	281	355	457									1187.04	1398.09	1343.4	1771.39	2676.87
																					1585.88	1543.22	2220.86
nohs_avg	178.333	190	216	225.667	267.667	320	372.667	379	334.667	363	377.667	338		268.583	284.69	232.906	240.503	400.204	493.819	1204.33	1554.99	1701.34	2195.73	2666.07	3188.82
hs_blimp1_en_backgroundsubtract	wRNAi_GSC	wRNAi_region 1	wRNAi_2A	wRNAi_2B	wRNAi_st1-2	wRNAi_st3-4	wRNAi_st5	wRNAi_st6	wRNAi_st7	wRNAi_st8	wRNAi_st9	wRNAi_st10		ezRNAi2_GSC	ezRNAi2_region 1	ezRNAi2_2A	ezRNAi2_2B	ezRNAi2_st1-2	ezRNAi2_st3-4	ezRNAi2_st5	ezRNAi2_st6	ezRNAi2_st7	ezRNAi2_st8	ezRNAi2_st9	ezRNAi2_st10
	1623	3814	1452	859	894	1483	1685	1196	228	259	79	38		2268	4522	1836	1919	1891	2864	3755	2930	3075	7769	7733	5486
	1375	3187	1262	1340	1282	1651	2153	1161	779	203	80	119		2028	2682	2001	1968	1825	2464	3027	3415	4892	7723	7862	5531
	1716	2795	1201	1370	1271	1701	1898	1442	564	324	125	227		2262	3618	1596	2143	2172	1652	3803	3884	3359	4046
	1279	4090	1593	538	999	1093	1208	791	684	131	97			2191	4129	1187	2336	1745	2129	3873	3650	7459	4491
	1500	3503	1466	1370	550	1123	1370	1092	349	193	85			1814	2820	1383	1851	1332	2218	3956	4097
	2189	3263	1054	923	697	1152	1261	990	782	195	78			1327	4142		1686	1480	1969	3083	4052
	1803	4184	1050	1142	1104	1048	2422	1121	614	258				1435	3199		1798	2352	2275		2803
	1473	4410			1129	1144	1424	1214	1318	192				1055	2522		1608	1859	2850		3528
	1597	3296			552	1546	2702	1784	761	148				1433			1485	1934
	1759	3329			486	1976	2749		582	267
	1629	4809					1572		1061	76
	1343	4438					2324		643	372
		4606								185
		4389								177
AVERAGE	1607.17	3865.21	1296.86	1077.43	896.4	1391.7	1897.33	1199	697.083	212.857	90.6667	128		1757	3454.25	1600.6	1866	1843.33	2302.62	3582.83	3544.88	4696.25	6007.25	7797.5	5508.5
STDEV	247.437	632.712	212.407	318.028	306.148	322.286	558.298	280.765	288.906	77.3214	18.2282	94.8209		456.557	758.577	329.458	264.532	312.446	416.36	414.813	483.097	2007.3	2016.03	91.2168	31.8198

## Sheet: antp
hs_antp	wRNAi_GSC	wRNAi_region 1	wRNAi_2A	wRNAi_2B	wRNAi_st1-2	wRNAi_st3-4	wRNAi_st5	wRNAi_st6	wRNAi_st7	wRNAi_st8	wRNAi_st9	wRNAi_st10		w2RNAi_GSC	w2RNAi_region 1	w2RNAi_2A	w2RNAi_2B	w2RNAi_st1-2	w2RNAi_st3-4	w2RNAi_st5	w2RNAi_st6	w2RNAi_st7	w2RNAi_st8	w2RNAi_st9	w2RNAi_st10		ezRNAi2_GSC	ezRNAi2_region 1	ezRNAi2_2A	ezRNAi2_2B	ezRNAi2_st1-2	ezRNAi2_st3-4	ezRNAi2_st5	ezRNAi2_st6	ezRNAi2_st7	ezRNAi2_st8	ezRNAi2_st9	ezRNAi2_st10		scmRNAi2_GSC	scmRNAi2_region 1	scmRNAi2_2A	scmRNAi2_2B	scmRNAi2_st1-2	scmRNAi2_st3-4	scmRNAi2_st5	scmRNAi2_st6	scmRNAi2_st7	scmRNAi2_st8
	2783	7594	1410	1741	2883	4022	5063	7595	3597	2311	1056	904		2357	5935	1060	1908	1685	2867	3344	3510	3203	2548	2589	1050		1852	2259	1265	1753	1883	2857	5353	7196	8835	8267	5714	9587		2085	2957	1531	1690	2705	4440	4024	6926	3556	4867
	2957	8386	1299	2052	2453	3833	5595	4142	3859	1740	1115	1188		2084	4454	1222	1692	1608	2532	2832	5837	4439	3074	2618	1053		1606	3036	1130	2529	2687	2904	5210	7189	6020	11507	5740	6306		2397	2809	1467	1145	2764	2863	5864	5754	3956	3935
	2233	6548	1938	1419	1452	3544	5203	6638	4195	1886	1133	1527		1693	4701	975	1635	1401	3094	2570	5409	4577	1529	2180	1110			4034	1403	1763	3478	3767	3881	9473	8010	9046	7070			2085	2990	1285	2095	2567	2909	5400	6021	4478	5191
	2785	3824	1428	1749	2440	4417	4512	7867	3624	2199	1314	944		1964	3533	900	1129	2130	1621	3840	2289	2099	1221	1805	1841			3950				3939	4362	9951	6364						4833		1002				6080	5946	4029
	2361	5532	1054	1757	1765	3626	6000	4884	4808	2275	1269	962			4793			1557	1602	4366	2810	3047	937	904	2095							2378	4038	6194							4431						4711	3984
	2342	5910	1320	1621	1225	4268	4486	7652	3546	2886	1212				2946			1933	1712	2407				1841																							6340	5289
			1578	1856	2136	3498		5859	4819	2962	1388									2545				1365																								5759
			1393	1432	2376	4010		5510	3340	2885										2457				2184
					1170	3475		5836	3997	1935										2264
						3345		6973	3772	1943
						3206		5130	2836	1968
						2691		5839	3064
						3583		6495	3474
						3786		5790	3353
nohs_antp	219	240	286	239	405	578	1511	1171	1584	1142	1083	357		140	128	155	335	667	967	1269	1972	1621	1382	1496	636		137	189	222	284	511	1027	1423	1346	2238	1791	2288	1074		105	111	124	185	498	522	682	1328	1227	892
	202	271	279	271	542	795	815	1874	1920	1445	1558	403		140	146	296	484	447	598	1367	1003	1800	1289	1089	617		131	139	135	176	355	814	1439	1481	2123	1276	1310	642		131	129	176	332	417	613	730	922	1560	1454
	224	209	232	266	476	1205	639	1304	1889	1376	1389	740		138	164	153	307	534	1063	925	1603	1720	1380	1601	696		166	191	197	211	513	809	1153	1549	1600	1750	1995	1151		139	129	153	236	538	736	677	1781	1919	1432
					365	872	552	1254	1673	1019	1209	814						554	588	1204	870	1876	1579	1440											2045	2552										801			1712
					529	1046	1706	1446	1457	1225	1086											1750	1513												1665
						816	1039	1200	1329	1464	1173												1859
						1174		1262	1703	1604													926
						1390			1454	1363
						565			1750	1091
						549			1795	1823
										1189
										1791
										1175
nohs_avg	215	240	265.667	258.667	463.4	899	1043.67	1358.71	1655.4	1362.08	1249.67	578.5		139.333	146	201.333	375.333	550.5	804	1191.25	1362	1753.4	1418.29	1406.5	649.667		144.667	173	184.667	223.667	459.667	883.333	1338.33	1458.67	1934.2	1842.25	1864.33	955.667		125	123	151	251	484.333	623.667	722.5	1343.67	1568.67	1372.5
hs_antp_backgroundsubtract	wRNAi_GSC	wRNAi_region 1	wRNAi_2A	wRNAi_2B	wRNAi_st1-2	wRNAi_st3-4	wRNAi_st5	wRNAi_st6	wRNAi_st7	wRNAi_st8	wRNAi_st9	wRNAi_st10		w2RNAi_GSC	w2RNAi_region 1	w2RNAi_2A	w2RNAi_2B	w2RNAi_st1-2	w2RNAi_st3-4	w2RNAi_st5	w2RNAi_st6	w2RNAi_st7	w2RNAi_st8	w2RNAi_st9	w2RNAi_st10		ezRNAi2_GSC	ezRNAi2_region 1	ezRNAi2_2A	ezRNAi2_2B	ezRNAi2_st1-2	ezRNAi2_st3-4	ezRNAi2_st5	ezRNAi2_st6	ezRNAi2_st7	ezRNAi2_st8	ezRNAi2_st9	ezRNAi2_st10		scmRNAi2_GSC	scmRNAi2_region 1	scmRNAi2_2A	scmRNAi2_2B	scmRNAi2_st1-2	scmRNAi2_st3-4	scmRNAi2_st5	scmRNAi2_st6	scmRNAi2_st7	scmRNAi2_st8
	2568	7354	1144	1482	2420	3123	4019	6237	1942	949	-193	326		2218	5789	859	1533	1134	2063	2153	2148	1450	1130	1183	400		1708	2086	1080	1529	1423	1974	4015	5737	6901	6425	3850	8631		1960	2834	1380	1439	2221	3816	3302	5582	1987	3495
	2742	8146	1033	1793	1990	2934	4551	2784	2204	378	-134	610		1945	4308	1021	1317	1057	1728	1641	4475	2686	1656	1212	403		1462	2863	945	2305	2227	2021	3872	5730	4086	9665	3876	5350		2272	2686	1316	894	2280	2239	5142	4410	2387	2563
	2018	6308	1672	1160	989	2645	4159	5280	2540	524	-116	949		1554	4555	774	1260	850	2290	1379	4047	2824	111	774	460			3861	1218	1539	3018	2884	2543	8014	6076	7204	5206			1960	2867	1134	1844	2083	2285	4678	4677	2909	3819
	2570	3584	1162	1490	1977	3518	3468	6509	1969	837	65	366		1825	3387	699	754	1579	817	2649	927	346	-197	399	1191			3777				3056	3024	8492	4430						4710		751				4736	4377	2657
	2146	5292	788	1498	1302	2727	4956	3526	3153	913	20	384			4647			1006	798	3175	1448	1294	-481	-502	1445							1495	2700	4735							4308						3367	2415
	2127	5670	1054	1362	762	3369	3442	6294	1891	1524	-37				2800			1382	908	1216				435																							4996	3720
			1312	1597	1673	2599		4501	3164	1600	139									1354				-41																								4190
			1127	1173	1913	3111		4152	1685	1523										1266				778
					707	2576		4478	2342	573										1073
						2446		5615	2117	581
						2307		3772	1181	606
						1792		4481	1409
						2684		5137	1819
						2887		4432	1698
AVERAGE	2361.83	6059	1161.5	1444.38	1525.89	2765.57	4099.17	4799.86	2079.57	909.818	-36.5714	527		1885.5	4247.67	838.25	1216	1168	1434	1767.33	2609	1720	443.8	529.75	779.8		1585	3146.75	1081	1791	2222.67	2286	3230.8	6541.6	5373.25	7764.67	4310.67	6990.5		2064	3481	1276.67	1232	2194.67	2780	4374	4628	3140.71	3133.5
STDEV	300.106	1609.96	254.201	211.291	610.565	444.373	596.416	1103.15	576.393	445.193	118.753	260.645		275.469	1045.92	138.259	329.682	266.669	674.785	731.66	1576.34	1036.13	910.623	589.167	500.019		173.948	839.26	136.503	445.165	797.509	660.256	675.22	1623.41	1338.48	1691.2	775.49	2320.02		180.133	951.578	127.63	504.314	101.106	897.497	956.928	734.473	952.582	619.977
[truncated: 2 more columns]

## Sheet: OR67D
hs_OR67D	wRNAi_GSC	wRNAi_region 1	wRNAi_2A	wRNAi_2B	wRNAi_st1-2	wRNAi_st3-4	wRNAi_st5	wRNAi_st6	wRNAi_st7	wRNAi_st8	wRNAi_st9	wRNAi_st10		w2RNAi_GSC	w2RNAi_region 1	w2RNAi_2A	w2RNAi_2B	w2RNAi_st1-2	w2RNAi_st3-4	w2RNAi_st5	w2RNAi_st6	w2RNAi_st7	w2RNAi_st8	w2RNAi_st9	w2RNAi_st10		ezRNAi1_GSC	ezRNAi1_region 1	ezRNAi1_1A	ezRNAi1_1B	ezRNAi1_st1-1	ezRNAi1_st3-4	ezRNAi1_st5	ezRNAi1_st6	ezRNAi1_st7	ezRNAi1_st8	ezRNAi1_st9	ezRNAi1_st10		scmRNAi2_GSC	scmRNAi2_region 1	scmRNAi2_2A	scmRNAi2_2B	scmRNAi2_st1-2	scmRNAi2_st3-4	scmRNAi2_st5	scmRNAi2_st6	scmRNAi2_st7	scmRNAi2_st8
	1588	4594	1160	1234	2380	2974	4898	5332	2917	2662	1229	873		1606	3042	1095	1151	1791	2694	3538	3399	2637	2253	913	1247		1852.36	4660.09	2381.78	2697.61	3492.52	4978.69	5958.57	5903.52	5198.09	6534.48	7235.92	6630.35		1599	2292	890	1069	1016	1458	1771	1371	1254	967
	1929	2861	1999	1364	2517	3237	4190	5025	3418	3011	2083	1172		1460	2831	1655	1185	1912	1987	2612	1376	1353	2203	1048	657		2763.22	3891.47	2380.93	2601.49	2223.79	5804.8	4949.73	5658.21	6974.2	5627.55	5838.58	5912.84		1188	2189	741	1111	1028	897	1495	783	858	758
	1926	3478	1614	1496	1998	3201	4605	3369	2930	2947	1417	1422		1258	2576	814	1414	1533	2604	2696	3130	1817	1725	1376	703		1621.94	3891.17	2157.29	2433	3399.62	4627.1	5867.89	5810.25	4292.1	5193.69	5600.53			2033	2016	614	672	1220	933	1081	1214	981	602
	2045	3825	1277	1819	2164	2059	4054	3876	3022	1864	2637	740		1350	2136	1152	1170	1643	1463	3203	2917	2118	1263	1018	1031		2066.09	3045.95	2092.41	2247.41	3540.48	3852.7	4424.65	5027.27	5797.76	4790	6605.06				3335	657	749	1127	1414	1080	953	1053	978
	1838	4250	1504	2007	2234	3166	5032	3594	3473	1822		928		1540	2967		1290	2425	1587	2845	3322	1822	1652	857			2166.34	4379.41	2279.48	1925.22	3432.88	4794.66	4481.61	5165.52	4729.93	6087.65									1205	1240	1640	1026
	1673		1244	1566	2033	2543	2861	4224	3630	1820				1546	2698		1508	1831	2240		3570	1846	1629	1167			2250.22	3960.02		2491.04		4140.96	4525.3		7100.41										1577	1688	1311	1334
	2214		1180		1776	3347	3585	3954	2834	2938								1478	2072			3042	2051					4076.01		2092.58			4941.09		4953.82
	3063				1975	3792	2872	4348	3356	2810								1775	3118			2323	2389										5280.49
					1727	2605	4435	4698	3350	2716								1371	2552			2466	1655										5023.35
						3984	4014	3836		2197																							5455.67
						2757		3938																									4815.29
						3234
nohs_OR67D	169	201	254	295	441	915	1248	1712	999	913	1390	518		146	165	210	228	242	755	1047	1366	1149	1267	992	840		221.964	219.915	228.652	272.844	272.672	378.798	312.326	790.175	832.291	600.144	1420.36	1599.31		134	147	178	188	189	359	565	808	846	902
	156	191	292	537	466	708	1447	863	860	833	1169	977		128	140	146	165	518	548	1056	1351	1735	1368	872	805		257.01	260.763	237.062	270.612	329.649	450.04	672.449	668.363	772.339	1036.41	1387.36	1082.23		97	103	93	120	241	413	785	1170	1047	922
	187	205	250	274	592	822	1317	926	1112	912	1274	1059		132	139	160	239	844	907	968	1080	1132	1040	773	563								345.624	779.913	935.487	1327.19	1308.05	1231.58		115	82	139	122	235	712	1166	1117	949	884
				310		1160	1176	586	946		1231							450	759	826	1099	1220	1098	1315									674.086		677.775	979.778	1365.86	989.624		172	166	232	294	339	700	713	841	1021	871
				282		1029		490	917		1689							690	709	1306	1276	1643	1422										381.956		717.574	950.488	1210.31
						1282		1291	1180		1482							388																		1258.92
						1034		1026			1335
						1186		1452			1448
						1140					1103
nohs_avg	170.667	199	265.333	339.6	499.667	1030.67	1297	1043.25	1002.33	886	1346.78	851.333		135.333	148	172	210.667	522	735.6	1040.6	1234.4	1375.8	1239	988	736		239.487	240.339	232.857	271.728	301.161	414.419	477.288	746.15	787.093	1025.49	1338.39	1225.69		129.5	124.5	160.5	181	251	546	807.25	984	965.75	894.75
hs_OR67D_backgroundsubtract	wRNAi_GSC	wRNAi_region 1	wRNAi_2A	wRNAi_2B	wRNAi_st1-2	wRNAi_st3-4	wRNAi_st5	wRNAi_st6	wRNAi_st7	wRNAi_st8	wRNAi_st9	wRNAi_st10		w2RNAi_GSC	w2RNAi_region 1	w2RNAi_2A	w2RNAi_2B	w2RNAi_st1-2	w2RNAi_st3-4	w2RNAi_st5	w2RNAi_st6	w2RNAi_st7	w2RNAi_st8	w2RNAi_st9	w2RNAi_st10		ezRNAi1_GSC	ezRNAi1_region 1	ezRNAi1_1A	ezRNAi1_1B	ezRNAi1_st1-1	ezRNAi1_st3-4	ezRNAi1_st5	ezRNAi1_st6	ezRNAi1_st7	ezRNAi1_st8	ezRNAi1_st9	ezRNAi1_st10		scmRNAi2_GSC	scmRNAi2_region 1	scmRNAi2_2A	scmRNAi2_2B	scmRNAi2_st1-2	scmRNAi2_st3-4	scmRNAi2_st5	scmRNAi2_st6	scmRNAi2_st7	scmRNAi2_st8
	1417	4395	895	894	1880	1944	3601	4289	1915	1776	-118	22		1471	2894	923	940	1269	1958	2497	2165	1261	1014	-75	511		1613.36	4420.09	2148.78	2425.61	3191.52	4564.69	5481.57	5157.52	4411.09	5509.48	5897.92	5404.35		1469	2167	729	888	765	912	964	387	288	72
	1758	2662	1734	1024	2017	2207	2893	3982	2416	2125	736	321		1325	2683	1483	974	1390	1251	1571	142	-23	964	60	-79		2524.22	3651.47	2147.93	2329.49	1922.79	5390.8	4472.73	4912.21	6187.2	4602.55	4500.58	4686.84		1058	2064	580	930	777	351	688	-201	-108	-137
	1755	3279	1349	1156	1498	2171	3308	2326	1928	2061	70	571		1123	2428	642	1203	1011	1868	1655	1896	441	486	388	-33		1382.94	3651.17	1924.29	2161	3098.62	4213.1	5390.89	5064.25	3505.1	4168.69	4262.53			1903	1891	453	491	969	387	274	230	15	-293
	1874	3626	1012	1479	1664	1029	2757	2833	2020	978		-111		1215	1988	980	959	1121	727	2162	1683	742	24	30	295		1827.09	2805.95	1859.41	1975.41	3239.48	3438.7	3947.65	4281.27	5010.76	3765	5267.06				3210	496	568	876	868	273	-31	87	83
	1667	4051	1239	1667	1734	2136	3735	2551	2471	936		77		1405	2819		1079	1903	851	1804	2088	446	413	-131			1927.34	4139.41	2046.48	1653.22	3131.88	4380.66	4004.61	4419.52	3942.93	5062.65									659	433	656	60
	1502		979	1226	1533	1513	1564	3181	2628	934				1411	2550		1297	1309	1504		2336	470	390	179			2011.22	3720.02		2219.04		3726.96	4048.3		6313.41										1031	881	327	368
	2043		915		1276	2317	2288	2911	1832	2052								956	1336			1666	812					3836.01		1820.58			4464.09		4166.82
	2892				1475	2762	1575	3305	2354	1924								1253	2382			947	1150										4803.49
					1227	1575	3138	3655	2348	1830								849	1816			1090	416										4546.35
						2954	2717	2793		1311																							4978.67
						1727		2895																									4338.29
						2204
AVERAGE	1863.5	3602.6	1160.43	1241	1589.33	2044.92	2757.6	3156.45	2212.44	1592.7	229.333	176		1325	2560.33	1007	1075.33	1229	1521.44	1937.8	1718.33	782.222	629.889	75.1667	173.5		1881.03	3746.3	2025.38	2083.48	2916.86	4285.82	4588.79	4766.95	4791.04	4621.67	4982.02	5045.59		1476.67	2333	564.5	719.25	846.75	701.333	585.5	228	118.333	-68.75
STDEV	460.078	674.343	304.508	287.426	261.711	534.07	758.508	604.728	289.513	498.4	448.742	270.618		132.677	328.169	350.041	146.673	309.615	539.267	385.808	804.403	513.46	370.977	187.601	279.921		388.7	503.25	130.819	279.249	558.339	684.538	526.93	393.263	1097.13	693.197	746.007	507.355		422.552	595.654	121.689	222.011	95.4791	284.313	302.996	306.396	177.431	180.541
[truncated: 14 more columns]

[truncated: 6 more sheets: rn, Dak1, Tsp68C, Pb_133, klu, Fig1GHand6Asummary.txt]
